# Supplementary material
Source: publisher figshare collection journal article supplement (https://wiley.figshare.com/articles/dataset/_/3547062)
Supplement: Supplementary file 1 [file 1 › appendix-D.htm]

Ecological Archives E091-106-A4


### *Ecological Archives* E091-106-A4

### **Orr Spiegel and Ran Nathan. 2010. Incorporating density dependence into directed-dispersal hypothesis. *Ecology* 91:1538–1548.**

Appendix D. The effect of variation in the DrD level on mutant establishment.

> View / download PDF.

---


[Back to E091-106]
